# Supplementary material for: Maltase protein of Ogataea (Hansenula) polymorpha is a counterpart to the resurrected ancestor protein ancMALS of yeast maltases and isomaltases
Source: PubMed Central journal article supplement (PMC5074314; doi:10.1002/yea.3157), 2016-04-21
Supplement: YEA-33-415-s001.pdf [file YEA-33-415-s001.pdf]

## Supporting information

### Maltase protein of *Ogataea (Hansenula) polymorpha* is a counterpart to resurrected ancestor protein ancMALS of yeast maltases and isomaltases

Katrin Viigand<sup>1</sup>, Triinu Visnapuu<sup>1,2</sup>, Karin Mardo, Anneli Aasamets and Tiina Alamäe\*

Department of Genetics, Institute of Molecular and Cell Biology, University of Tartu, Riia 23, 51010 Tartu, Estonia

<sup>1</sup> These authors contributed equally to this work

<sup>2</sup> Current address: Department of Systems Biology, Technical University of Denmark, Elektrovej, building 375, 2800 Kgs. Lyngby, Denmark

\* Correspondence to: T. Alamäe, Department of Genetics, Institute of Molecular and Cell Biology, University of Tartu, Riia 23, 51010 Tartu, Estonia

Tel.: +372 7375013

E-mail: [talamae@ebc.ee](mailto:talamae@ebc.ee)

**Table S1.** Primers used for cloning and site-directed mutagenesis of *Ogataea polymorpha* maltase gene *MAL1*. The underlined sequences are pairing with the pURI3Cter vector (Curiel *et al.*, 2011) and sequences complementary to the beginning and end of the *MAL1* gene are shown in italic. Start and stop codons are marked with bold letters. Mutated codons are highlighted with a gray background.

| Primer and function                   | Sequence                                                        | Changed codon and amino acid | Reference                    |
|---------------------------------------|-----------------------------------------------------------------|------------------------------|------------------------------|
| MAL1_PURICterm_Fw Cloning Fw primer   | 5'- <u>TAAC</u> TTTAAGAAGGAGATATACATATGACTATCGAGTCTCAAGAACCT-3' | No change                    | This work                    |
| MAL1_PURICterm_Rev Cloning Rev primer | 5'-GCTATTAATGATGATGATGATGATGATTGACCTCGATCAGTCTACCTTC-3'         | No change                    | This work                    |
| T7 Mutagenesis Fw primer              | 5'-TAATACGACTCACTATAGGG-3'                                      | No change                    | Viigand <i>et al.</i> , 2005 |
| Asp199AlaRev Mutagenesis Rev primer   | 5'-AGGCCGGCAGTGGCGATTCTG-3'                                     | GTC → GGC;<br>Asp → Ala      | This work                    |
| Thr200ValRev Mutagenesis Rev primer   | 5'-GAGGCCGGCAACGTCGATTCTG-3'                                    | AGT → AAC;<br>Thr → Val      | This work                    |

**Table S2.** Abbreviations and accession numbers of 18  $\alpha$ -glucosidases of various yeast species addressed in the work.

| Abbreviation    | Yeast species and enzyme                                                      | UniProtKB accession number                 |
|-----------------|-------------------------------------------------------------------------------|--------------------------------------------|
| <i>Ba</i>       | <i>Blastobotrys (Arxula) adenivorans</i> CBS8244 $\alpha$ -glucosidase*       | A0A060T069                                 |
| <i>Sp</i>       | <i>Schizosaccharomyces pombe</i> 972 h- ATCC24843 $\alpha$ -glucosidase       | Q9P6J3                                     |
| <i>Kl</i>       | <i>Kluyveromyces lactis</i> NRRLY-1140 $\alpha$ -glucosidase                  | Q6CSK8                                     |
| <i>Sc_MAL12</i> | <i>Saccharomyces cerevisiae</i> Sc288c ATCC204508 maltase MAL12               | P53341                                     |
| ancMALS         | Resurrected ancestral maltase                                                 | (Voordeckers <i>et al.</i> , 2012)         |
| ancMAL-IMA      | Resurrected ancestral maltase-isomaltase                                      | (Voordeckers <i>et al.</i> , 2012)         |
| <i>Sc_IMA1</i>  | <i>Saccharomyces cerevisiae</i> Sc288c ATCC204508 isomaltase IMA1             | P53051                                     |
| <i>Td</i>       | <i>Torulaspora delbrueckii</i> CBS1146 isomaltase*                            | Q5J9B3                                     |
| <i>Ls</i>       | <i>Lipomyces starkeyi</i> CBS1807 (NRRLY-11557) $\alpha$ -glucosidase*        | Protein ID: 3262; scaffold_6:175313-177164 |
| <i>Op</i>       | <i>Ogataea (Hansenula) polymorpha</i> CBS4732 $\alpha$ -glucosidase MAL1      | Q9P8G8                                     |
| <i>Le</i>       | <i>Lodderomyces elongisporus</i> CBS2605 (NRRL YB-4239) $\alpha$ -glucosidase | A5DVH3                                     |
| <i>Ps_AGL1</i>  | <i>Pichia (Scheffersomyces) stipitis</i> CBS6054 $\alpha$ -glucosidase AGL1*  | A3LWN5                                     |
| <i>Ps_MAL8</i>  | <i>Pichia (Scheffersomyces) stipitis</i> CBS6056 maltase MAL8*                | A3LXA2                                     |
| <i>Ps_MAL7</i>  | <i>Pichia (Scheffersomyces) stipitis</i> CBS6057 maltase MAL7*                | A3LUP5                                     |
| <i>Ps_MAL6</i>  | <i>Pichia (Scheffersomyces) stipitis</i> CBS6055 maltase MAL6*                | A3LNM1                                     |
| <i>Ca</i>       | <i>Candida albicans</i> NCBI5476 (ATCC18804) maltase                          | Q02751                                     |
| <i>Ps_MAL9</i>  | <i>Pichia (Scheffersomyces) stipitis</i> CBS6054 maltase MAL9*                | A3GIC0                                     |
| <i>Dh</i>       | <i>Debaryomyces hansenii</i> CBS767 (NRRLY-7426) $\alpha$ -glucosidase*       | Q6BXY6                                     |

\* Predicted from the gene sequence, experimentally not studied

**Table S3.** Identity matrix of protein sequences of 18  $\alpha$ -glucosidases addressed in the work. The matrix was calculated using MUSCLE (v. 3.8.31) and created using Clustal2.1 as alignment format. Identity values are shown in percentages (%). For abbreviations see Table S2.

|                   | <i>Ba</i> | <i>Sp</i> | <i>Kl</i> | <i>Sc_MAL12</i> | <i>ancMALS</i> | <i>ancMAL-IMA</i> | <i>Sc_IMA1</i> | <i>Td</i> | <i>Ls</i> | <i>Op</i> | <i>Le</i> | <i>Ps_AGL1</i> | <i>Ps_MAL8</i> | <i>Ps_MAL7</i> | <i>Ps_MAL6</i> | <i>Ca</i> | <i>Ps_MAL9</i> | <i>Dh</i> |
|-------------------|-----------|-----------|-----------|-----------------|----------------|-------------------|----------------|-----------|-----------|-----------|-----------|----------------|----------------|----------------|----------------|-----------|----------------|-----------|
| <i>Ba</i>         | 100.0     | 58.7      | 40.8      | 43.0            | 43.9           | 43.9              | 42.9           | 41.9      | 46.0      | 42.7      | 43.5      | 42.4           | 45.1           | 43.7           | 45.5           | 44.9      | 44.6           | 43.5      |
| <i>Sp</i>         | 58.7      | 100.0     | 39.1      | 40.3            | 42.7           | 42.7              | 39.8           | 40.0      | 47.1      | 44.1      | 44.4      | 44.6           | 46.5           | 45.3           | 46.7           | 45.8      | 45.0           | 46.7      |
| <i>Kl</i>         | 40.8      | 39.1      | 100.0     | 62.2            | 71.0           | 68.6              | 61.2           | 62.8      | 46.6      | 48.5      | 51.2      | 51.6           | 50.4           | 52.0           | 51.2           | 49.1      | 50.4           | 49.1      |
| <i>Sc_MAL12</i>   | 43.0      | 40.3      | 62.2      | 100.0           | 81.3           | 84.9              | 71.8           | 70.5      | 46.0      | 46.7      | 49.2      | 51.2           | 49.6           | 50.6           | 51.3           | 49.6      | 50.7           | 50.8      |
| <i>ancMALS</i>    | 43.9      | 42.7      | 71.0      | 81.3            | 100.0          | 95.6              | 78.4           | 76.2      | 47.9      | 50.2      | 53.8      | 53.8           | 54.5           | 54.7           | 55.2           | 51.5      | 51.9           | 53.3      |
| <i>ancMAL-IMA</i> | 43.9      | 42.7      | 68.6      | 84.9            | 95.6           | 100.0             | 82.2           | 78.9      | 47.9      | 49.1      | 52.9      | 53.1           | 53.1           | 53.5           | 53.8           | 50.3      | 51.6           | 52.9      |
| <i>Sc_IMA1</i>    | 42.9      | 39.8      | 61.2      | 71.8            | 78.4           | 82.2              | 100.0          | 83.0      | 46.8      | 47.3      | 51.2      | 51.0           | 51.9           | 50.4           | 52.2           | 49.7      | 51.6           | 52.0      |
| <i>Td</i>         | 41.9      | 40.1      | 62.8      | 70.5            | 76.2           | 78.9              | 83.0           | 100.0     | 47.7      | 45.7      | 50.4      | 51.2           | 50.8           | 50.1           | 50.6           | 49.6      | 49.1           | 52.0      |
| <i>Ls</i>         | 46.1      | 47.1      | 46.6      | 46.0            | 47.9           | 47.9              | 46.8           | 47.7      | 100.0     | 48.7      | 51.6      | 53.4           | 52.5           | 53.7           | 53.9           | 52.1      | 53.3           | 56.0      |
| <i>Op</i>         | 42.7      | 44.1      | 48.5      | 46.7            | 50.2           | 49.1              | 47.3           | 45.7      | 48.7      | 100.0     | 59.8      | 60.9           | 61.5           | 61.8           | 61.8           | 58.9      | 59.7           | 62.8      |
| <i>Le</i>         | 43.5      | 44.4      | 51.2      | 49.2            | 53.8           | 52.9              | 51.2           | 50.4      | 51.6      | 59.8      | 100.0     | 66.2           | 69.7           | 68.8           | 70.1           | 66.1      | 64.4           | 69.0      |
| <i>Ps_AGL1</i>    | 42.4      | 44.6      | 51.6      | 51.2            | 53.8           | 53.1              | 51.0           | 51.2      | 53.4      | 60.9      | 66.2      | 100.0          | 76.9           | 76.4           | 78.9           | 65.1      | 66.6           | 70.1      |
| <i>Ps_MAL8</i>    | 45.1      | 46.5      | 50.4      | 49.6            | 54.5           | 53.1              | 51.9           | 50.8      | 52.5      | 61.5      | 69.7      | 76.9           | 100.0          | 78.7           | 82.7           | 65.7      | 67.0           | 71.6      |
| <i>Ps_MAL7</i>    | 43.7      | 45.3      | 52.0      | 50.6            | 54.7           | 53.5              | 50.4           | 50.1      | 53.7      | 61.8      | 68.8      | 76.4           | 78.7           | 100.0          | 85.5           | 63.6      | 68.7           | 71.7      |
| <i>Ps_MAL6</i>    | 45.5      | 46.7      | 51.2      | 51.3            | 55.2           | 53.8              | 52.2           | 50.6      | 53.9      | 61.8      | 70.1      | 78.9           | 82.7           | 85.5           | 100.0          | 65.1      | 68.0           | 72.4      |
| <i>Ca</i>         | 44.9      | 45.8      | 49.1      | 49.6            | 51.5           | 50.3              | 49.7           | 49.6      | 52.1      | 58.9      | 66.1      | 65.1           | 65.7           | 63.6           | 65.1           | 100.0     | 70.7           | 68.0      |
| <i>Ps_MAL9</i>    | 44.6      | 45.0      | 50.4      | 50.7            | 51.9           | 51.6              | 51.6           | 49.1      | 53.3      | 59.7      | 64.4      | 66.6           | 67.0           | 68.7           | 68.0           | 70.7      | 100.0          | 72.8      |
| <i>Dh</i>         | 43.5      | 46.7      | 49.1      | 50.8            | 53.3           | 52.9              | 52.0           | 52.0      | 56.0      | 62.8      | 69.0      | 70.1           | 71.6           | 71.7           | 72.4           | 68.0      | 72.8           | 100.0     |

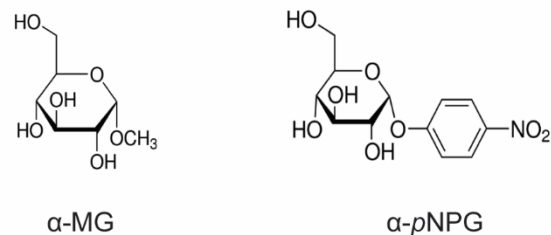

**Figure S1.** Structures of *Op* maltase substrates  $\alpha$ -methylglucoside (methyl  $\alpha$ -D-glucopyranoside;  $\alpha$ -MG) and *p*-nitrophenyl- $\alpha$ -D-glucopyranoside ( $\alpha$ -*p*NPG)

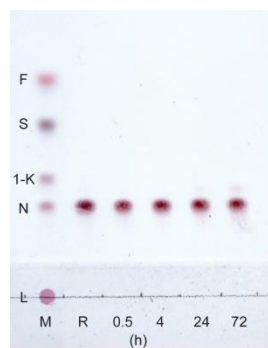

**Figure S2.** The *Op* maltase does not hydrolyze nystose. Reaction was conducted with 50 mM nystose in 100 mM K-phosphate buffer (pH 6.5) containing 0.1 mM EDTA using 13  $\mu$ g/ml of *Op* maltase protein (1 U/ml) and at shown time points the samples were taken out, the enzyme was inactivated by heating (5 min, 96°C) and the aliquots (0.5  $\mu$ l) were analysed on TLC. Sugar marker (M): fructose, F; sucrose, S; 1-kestose, 1-K; nystose, N; levan, L. Reference (R) designates 50 mM nystose which was incubated without the maltase added.

## Supplementary references

Curiel JA, de las Rivas B, Mancheño JM, Muñoz R. (2011). The pURI family of expression vectors: A versatile set of ligation independent cloning plasmids for producing recombinant His-fusion proteins. *Protein Expr Purif* **76**: 44-53.

Viigand K, Tammus K, Alamäe T. (2005). Clustering of *MAL* genes in *Hansenula polymorpha*: Cloning of the maltose permease gene and expression from the divergent intergenic region between the maltose permease and maltase genes. *FEMS Yeast Research* **5**: 1019-1028.

Voordeckers K, Brown CA, Vanneste K, *et al.* (2012). Reconstruction of ancestral metabolic enzymes reveals molecular mechanisms underlying evolutionary innovation through gene duplication. *PLoS Biol* **10**: e1001446.
